# Supplementary material
Source: publisher figshare collection journal article supplement (https://frontiersin.figshare.com/ndownloader/files/21190170)
Supplement: Supplementary file 1 [file 21190170]

## Sheet: Sheet2
Custom reference database for species of freshwater and marine turtles present in North America with sequences available on GenBank.
Species	Genbank Accession Number
Chelonia mydas	AJ543735
	AJ543734
	AJ543733
	AJ543735
	AJ543734
	AJ543733
	AJ543732
	AJ543731
	AJ543730
	AJ543729
	AJ276330
	AJ276329
	AJ831527
	AJ831526
	AJ831525
	AJ831524
	MF109839
	MF109838
	K011180
	K057745
	K057744
	K057743
	K057742
	K057741
	KM262220
	HQ377542
	HQ377541
	HQ377540
	HQ377539
	HQ377538
	HQ377537
	HQ377536
	HQ377535
	HQ377534
	HQ377533
	HQ377532
	HQ377531
	HQ377530
	HQ377529
	HQ377528
	MH004283
	MH004282
	MH004281
	MH004280
	MH004279
	MH004278
	MH004277
	MH004276
	K499514
	K499512
	K499510
	K499509
	K499508
	K499507
	K499506
	K499505
	K499504
	KU378112
	KU378111
	KR011755
	KR011754
	KJ502649
	KJ502648
	KJ502647
	KJ502646
	KJ502645
	KJ502644
	KJ502643
	KJ502642
	KJ502641
	KJ502640
	KJ502639
	KJ502638
	KJ502637
	KJ502636
	KJ502635
	KJ502634
	KJ502633
	KJ502632
	KJ502631
	KJ502630
	KJ502629
	KJ502628
	KJ502627
	KJ502626
	KJ502625
	KJ502624
	KJ502623
	KJ502622
	KJ502621
	KJ502620
	KJ502619
	KJ502618
	KJ502617
	KJ502616
	KJ502615
	KJ502614
	KJ502613
	KJ502612
	KJ502611
	KJ502610
	KJ502609
	KJ502608
	KJ502607
	KJ502606
	KJ502605
	KJ502604
	KJ502603
	KJ502602
	KJ502601
	KJ502600
	KJ502599
	KJ502598
	KJ502597
	KJ502596
	KJ502595
	KJ502594
	KJ502593
	KJ502592
	KJ502591
	KJ502590
	KJ502589
	KJ502588
	KJ502587
	KJ502586
	KJ502585
	KJ502584
	KJ502583
	KJ502582
	KJ502581
	KJ502580
	KJ502579
	KJ502578
	KJ502577
	KJ502576
	KJ502575
	KJ502574
	KJ502573
	KJ502572
	KJ502571
	KJ502570
	KJ502569
	KJ502568
	KJ502567
	KJ502566
	KJ502565
	KJ502564
	KJ502563
	KJ502562
	KM986630
	KM986629
	KP027611
	KP027610
	KP027609
	KP027608
	KM923924
	KM923923
	KM923922
	KM923921
	AB924487
	KF311766
	KF311765
	KF311764
	KF311763
	KF311762
	KF311761
	KF311760
	KF311759
	KF311758
	KF311757
	KF311756
	KF311755
	KF311754
	KF311753
	KF311752
	KF311751
	KF311750
	KF311749
	KF311748
	KF311747
	KF311746
	KF311745
	KF311744
	KF891284
	KF891283
	KC771270
	KJ598128
	KJ598127
	KJ598126
	KJ598125
	KJ598124
	KJ598123
	KJ598122
	KJ598121
	EU918366
	EU918365
	EU918364
	EU918363
	MG212518
	MG212517
	MG212516
	MG212515
	MG212514
	MG212513
	MG212512
	MG212511
	MG212510
	MG212509
	MG212508
	MG212507
	MG212506
	MG212505
	K247563
	K247562
	KY350181
	KY350180
	K499513
	K011181
	KT441100
	KT441099
	KT441098
	KT581619
	KT581618
	KT581617
	KT581616
	KT232136
	AB856322
	AB856321
	KM262224
	KM357661
	KM357660
	KM357659
	KM357658
	KM357657
	KM357656
	KM357655
	KM357654
	KM357653
	KM357652
	KM357651
	KM357650
	KM357649
	KM357648
	KM357647
	KM357646
	KM357645
	KM357644
	KM357643
	KF282706
	KF282705
	J306010
	J306009
	J306008
	J306007
	J306006
	JQ366073
	JN632502
	JN632501
	JN632500
	JN632499
	JN632498
	JN632497
	GU121961
	M98394
Apalone ferox	K882744
	FJ890514
	NC_014054
Apalone spinifera	JF966197
	NC_021371
	K882745
Chelydra serpentina	EF122793
	NC_011198
	AF029986
Clemmnys guttata	K558407
	K558406
Deirochelys reticularia	K558409
Dermochelys coriacea	MF460363
	KU883271
	KM357642
Emys blandingii	K558410
Glyptemys insculpta	K558422
	K558421
	K558423
Gopherus polyphemus	U22814
	U22813
Gopherus agassizii	U22812
Graptemys barbouri	K558416
	K558415
	KC687165
Graptemys flavimaculata	K558418
	K558417
Graptemys geographica	K558420
	K558419
	JN993969
	JN993968
Graptemys ouachitensis	JN993971
	JN993970
Graptemys pseudogeographica	JN993973
	JN993972
Lepidochelys kempii	KF385942
	KF385941
	KF385940
	KF385939
	KF385937
	KF385936
	KF385935
	AF374401
	AF374400
	KC609750
	KF385938
Caretta caretta x Lepidochelys kempii	AF374404
Lepidochelys olivacea	KP117262
	K812522
	K812521
	K812520
	K812519
	K812518
	K768698
	K768697
	K768696
	AY920523
	AY920522
	AY920521
	AY920520
	KM357633
	KM357632
	KM357631
	KM357630
	KM357629
	KC207830
	KC207829
	KC207828
	JN391465
	AY920519
	JN391464
	JN391463
	JN391462
	JN391461
	JN391460
	JN391459
	JN391458
	JN391457
	JN391456
	JN391455
	JN391454
	JN391453
	JN391452
	JN391451
	JN391450
	JN391449
	JN391448
	JN391447
	JN391446
	JN391445
Macrochelys temminckii	NC_009260
	EF071948
Malaclemys terrapin	K558425
	K558424
Malaclemys terrapin terrapin	NC_031300
	K774423
Pseudemys alabamensis	KC687171
	KC687170
	KC687169
	KC687168
	KC687167
	KC687166
Pseudemys concinna	KC687220
	KC687219
	KC687218
	KC687217
	KC687216
	KC687215
	KC687214
	KC687213
	KC687212
	KC687211
	KC687210
	KC687209
	KC687208
Pseudemys concinna suwanniensis	KC687227
	KC687226
	KC687225
	KC687224
	KC687223
	KC687222
	KC687221
Pseudemys concinna concinna	KC687196
	KC687195
	KC687194
	KC687193
	KC687192
	KC687191
	KC687190
	KC687189
	KC687188
	KC687187
	KC687186
	KC687185
	KC687184
	KC687183
	KC687182
	KC687181
	KC687180
	KC687179
	KC687178
	KC687177
	KC687176
	KC687175
	KC687174
	KC687173
	KC687172
Pseudemys floridana	KC687207
	KC687206
	KC687205
	KC687204
	KC687203
	KC687202
	KC687201
	KC687200
	KC687199
	KC687198
	KC687197
Pseudemys gorzugi	KC687230
	KC687229
	KC687228
Pseudemys nelsoni	KC687234
	KC687233
	KC687232
	KC687231
Pseudemys peninsularis	KC687240
	KC687239
	KC687238
	KC687237
	KC687236
	KC687235
Pseudemys rubriventris	K558426
	KC687244
	KC687243
	KC687242
	KC687241
Pseudemys texana	K558427
	KC687247
	KC687246
	KC687245
Sternotherus carinatus	HQ114563
	NC_017607
Sternotherus minor	U19540
Terrapene carolina	HQ639004
	HQ638998
	HQ638996
	HQ638994
	HQ638993
	HQ638985
	HQ638983
	K558429
	K558428
	KC687248
Terrapene carolina carolina	HQ639015
	HQ639012
	HQ639011
	HQ639010
	HQ639009
	HQ639007
	HQ639006
	HQ639005
	HQ639002
	HQ639001
	HQ638997
	HQ638992
	HQ638991
	HQ638990
	HQ638989
	HQ638988
	HQ638987
	HQ638986
	HQ638984
	HQ638982
Terrapene carolina bauri	HQ639003
	HQ639000
	HQ638999
Terrapene mexicana triunguis	HQ639016
	HQ639014
	HQ639013
	HQ639008
	HQ638995
Terrapene ornata luteola	K558435
	K558434
Trachemys scripta elegans	K558436
Caretta caretta	KC748471
	HM179462
	KC748470
	HM179461
	AB063118
	KT005407
	KT005406
	K929315
	K929314
	KJ806206
	KJ806205
	KJ806204
	FM955539
	FM244620
	FM200217
	GQ344479
	JF837824
	JF837822
	JF837823
	JF837821
	JF837820
	AB548646
	AB548645
	AB548644
	AB548643
	AB548642
	AB548641
	AB548640
	AB548639
	AB548638
	AB548637
	AB548636
	AB548635
	AB548634
	AB548633
	AB548632
	AB548631
	AB548629
	AB548628
	JQ350706
	JQ350705
	AF374399
	AF374398
	DQ060038
	EU352258
	AY742913
	AY742912
	AY742911
	AY742910
	AY742909
	AY742908
	U22261
	MF182628
	KT855091
	AB831109
	AB831108
	AB831107
	AB831106
	KF840728
	KF840727
	KF840726
	KF840725
	KF840724
	KF840723
	KF770994
	KC310494
	KC310493
	JQ340912
	JQ340911
	JQ082299
	EF687771
	JN039304
	JF957337
	JF957336
	JF922019
	JF922018
	JF922017
	JF922016
	JF922015
	JF922014
	EF396287
	HQ908658
	HQ908657
	HQ728521
	AY508990
	AY508989
	AY508988
	AY508987
	AY508986
	AY508985
	AY508984
	AY508983
	EU091309
	EU179451
	EU179449
	EU179450
	EU246539
	EU179463
	EU179462
	EU179461
	EU179460
	EU179459
	EU179458
	EU179457
	EU179456
	EU179455
	EU179454
	EU179453
	EU179452
	EU179448
	EU179447
	EU179446
	EU179445
	EU179444
	EU179443
	EU179442
	EU179441
	EU179440
	EU179439
	EU179438
	EU179437
	EU179436
	EF397612
	U72747
	NC_016923
	FR694649
	MF579505
	MF579504
	MF554690
Caretta caretta x Lepidochelys kempii	AF374404
	AF374403
	AF374402
Eretmochelys imbricata	AJ421797
	AJ421796
	AJ421795
	AJ421794
	DQ177341
	DQ177340
	DQ177339
	DQ177338
	K499511
	KJ603538
	KJ603537
	KJ603536
	KJ603534
	KJ603535
	KJ603533
	KJ603532
	KJ603531
	KJ603530
	KJ603529
	KM068147
	KM068146
	KM068145
	KM068144
	KM068143
	KM186920
	KM186919
	KM186918
	KM186917
	KM186916
	KM186915
	KM186914
	KM186913
	KM186912
	KM186911
	KM186910
	KM186909
	KM186908
	KM186907
	KM186906
	KM186905
	KM186904
	J289891
	J289890
	J289889
	J289888
	J289887
	J289886
	J289885
	J289884
	J289883
	J289882
	KC196503
	KC196502
	KC196501
	JN627023
	HQ890548
	GU997699
	GU997698
	GU997697
	GU997696
	GU997695
	GU997694
	FR798951
	FR775309
	FR775308
	DQ479349
	DQ479348
	DQ479347
	DQ479346
	DQ479345
	DQ479344
	DQ479343
	DQ479342
	DQ479341
	DQ479340
	DQ479339
	DQ479338
	DQ479337
	DQ479336
	DQ479335
	DQ479334
	DQ479333
	DQ479332
	DQ479331
	DQ479330
	DQ479329
	DQ479328
	DQ479327
	DQ479326
	U37807
	U37806
	U37805
	U37804
	K646708
	KT964296
	KT964295
	KT964294
	KT964293
	KT964292
	KT964291
	KT003685
	KR012505
	KR012504
	KR012503
	KR012502
	KU695259
	KU695258
	KT072798
	KT072797
	KT072796
	KT072795
	KT072794
	KT072793
	KT072792
	KT072791
	KT072790
	KT072789
	KT072788
	KT072787
	KT072786
	J306005
	KM357641
	KM357640
	KM357639
	KM357638
	KM357637
	KM357636
	KM357635
	KM357634
	KF806869
	KC241907
	KC241906
	KC196500
	KC196499
	KC196498
	GU138123
	GU138122
	HM030878
	HM030877
	HM030876
	HM030875
	HM030874
	HM030873
	HM030872
	HM030871
	HM030870
	HM030869
	HM030868
	HM030867
	HM030866
	HM030865
	HM030864
	GQ925509
	EF210801
	EF210800
	EF210799
	EF210798
	EF210797
	EF210796
	EF210795
	EF210794
	EF210793
	EF210792
	EF210791
	EF210790
	EF210789
	EF210788
	EF210787
	EF210786
	EF210785
	EF210784
	EF210783
	EF210782
	EF210781
	EF210780
	EF210779
	EU113049
	EU113048
	MF571906
Eretmochelys imbricata imbricata	U22368
Eretmochelys imbricata x Caretta caretta	DQ177337
	DQ177336
	DQ479352
Eretmochelys imbricata x Lepidochelys olivacea	DQ177335
	DQ479351
	DQ479350
